# Supplementary material for: Supramolecular ‘flat’ Mn9grid complexes—towards functional molecular platforms
Source: Royal Society of Chemistry journal article supplement (doi:10.1039/b515801j), 2006-01-01
Supplement: tables1.pdf [file tables1.pdf]

**Supplementary Table 1.** Solvent Parameters and Transition Energies for Bands I and II for  $[\text{Mn}(\text{II})_5\text{Mn}(\text{II})_4](\text{ClO}_4)_{10}$  (**9**).

| Solvent            | $D_s$ (temp. °C) | $\lambda_{\text{max}}, \text{nm} (E_{\text{abs}}, \text{cm}^{-1})$ |             | e (Band I)/e (Band II) |
|--------------------|------------------|--------------------------------------------------------------------|-------------|------------------------|
|                    |                  | Band I                                                             | Band II     |                        |
| Acetone            | 20.70 (25)       | 988 (10119)                                                        | 687 (14548) | 0.92                   |
| Nitromethane       | 36.15 (22)       | 1010 (9894)                                                        | 693 (14418) | 0.99                   |
| Acetonitrile       | 37.50 (20)       | 1004 (9957)                                                        | 700 (14275) | 1.04                   |
| Dimethyl Sulfoxide | 46.68 (20)       | 988 (10119)                                                        | 715 (13984) | 1.03                   |
| Water              | 80.10 (20)       | 1007 (9925)                                                        | 696 (14361) | 1.07                   |
