# Supplementary figures and images for: Supramolecular ‘flat’ Mn9grid complexes—towards functional molecular platforms
Source: Royal Society of Chemistry journal article supplement (doi:10.1039/b515801j), 2006-01-01

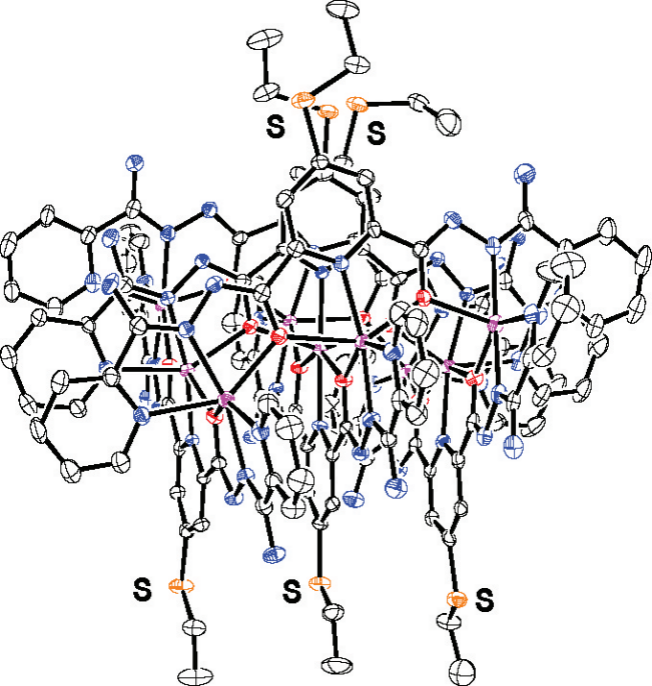

Supplement: figs1.pdf [file figs1.pdf]

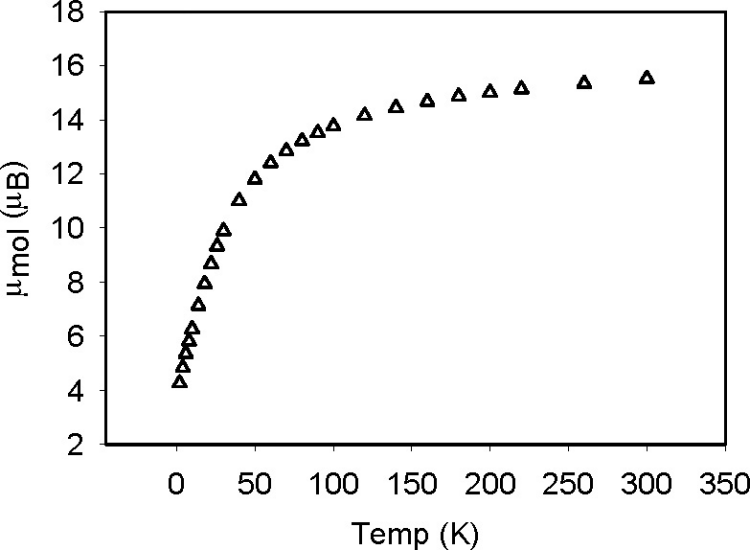

Supplement: figs2.pdf [file figs2.pdf]

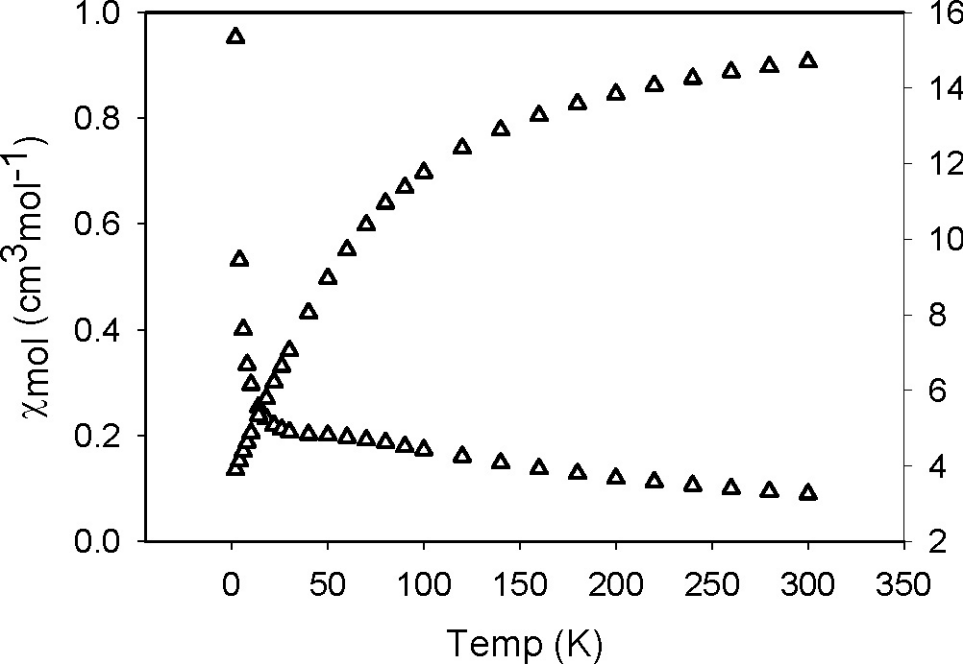

Supplement: figs3.pdf [file figs3.pdf]

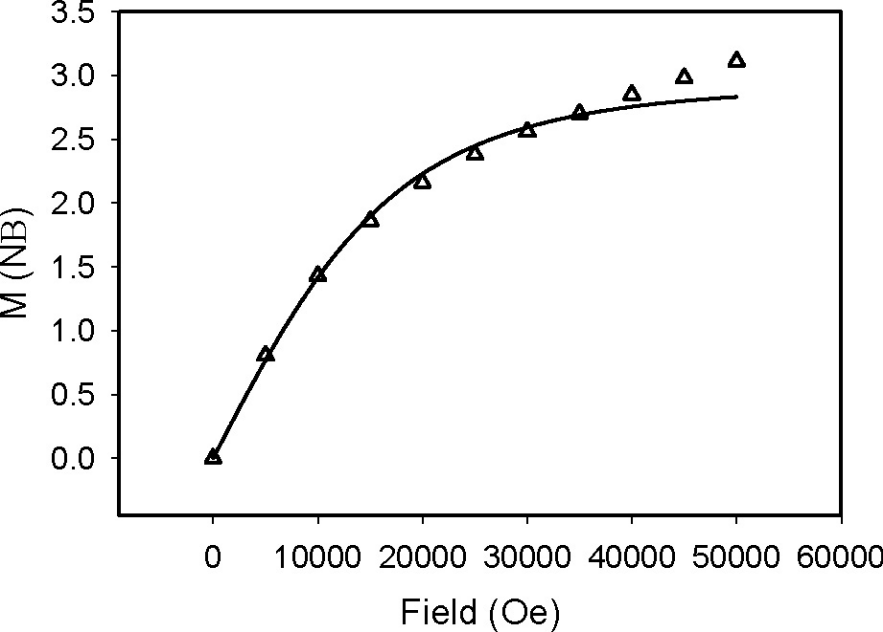

Supplement: figs4.pdf [file figs4.pdf]

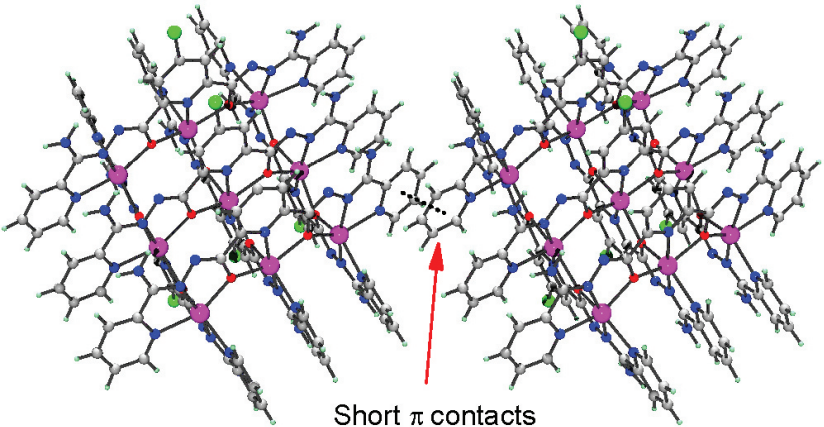

Supplement: figs5.pdf [file figs5.pdf]

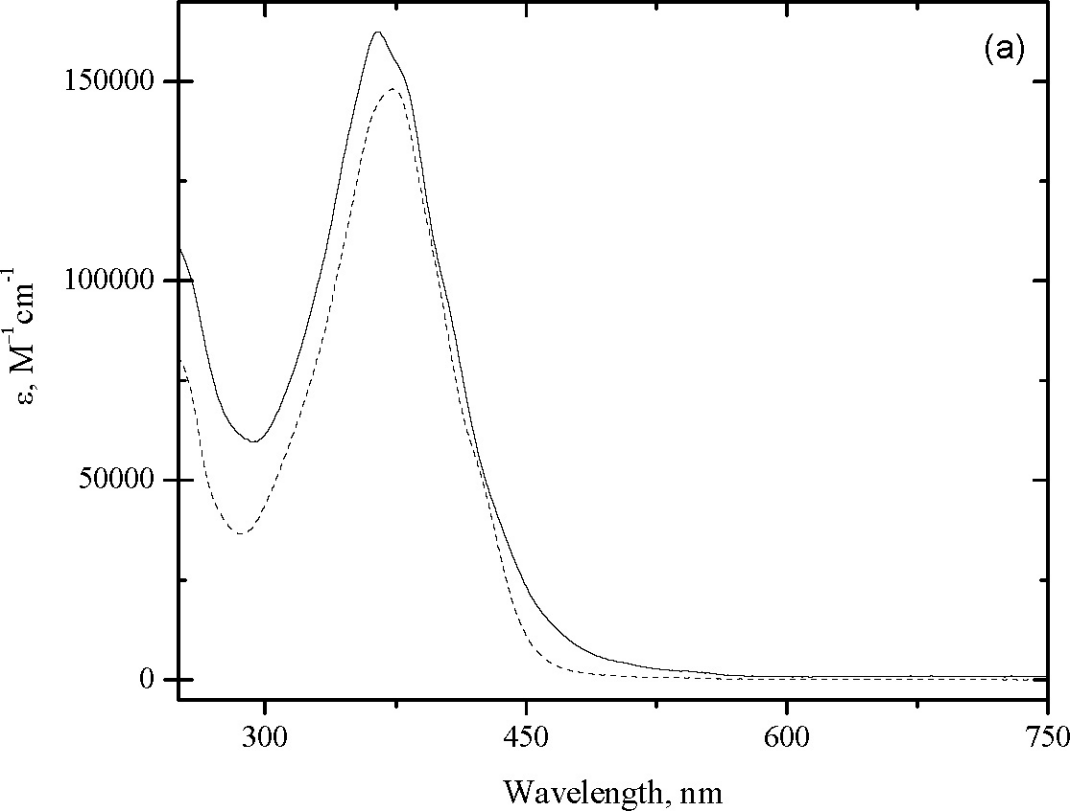

Supplement: figs7.pdf [file figs7.pdf]
